# Supplementary material
Source: PubMed Central journal article supplement (PMC7398559)

# Supplementary Figure S2b. DS-CTRD Unique Gene Mouse Homologs Gene Expression level on Mouse heart Development

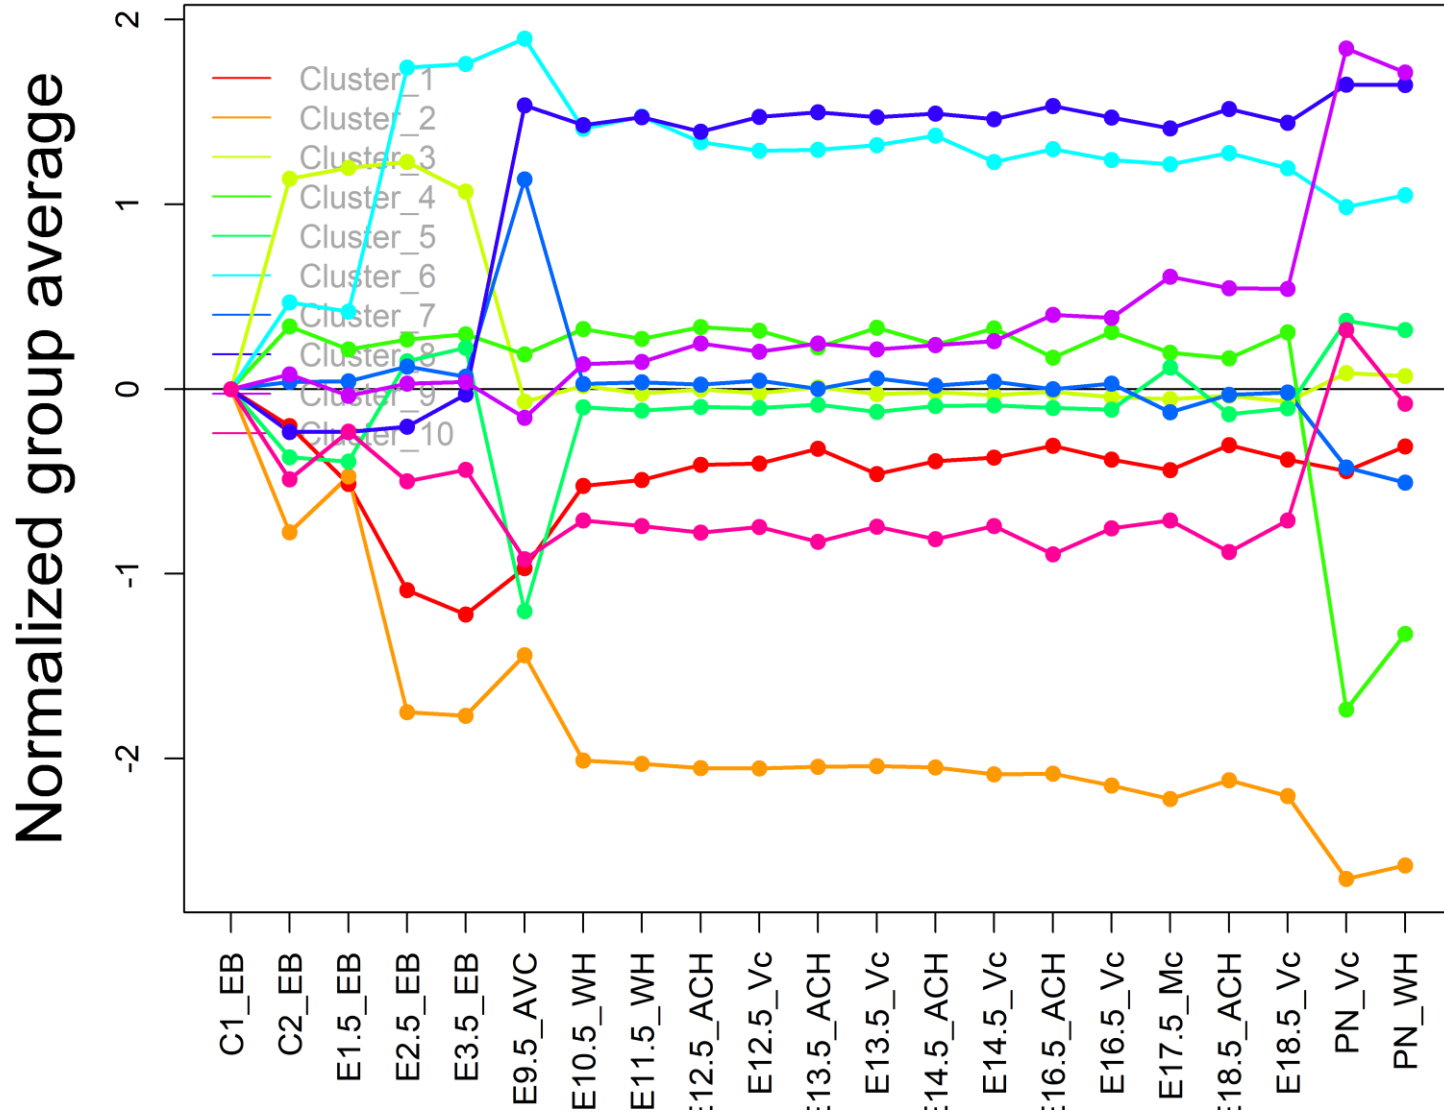

Supplement: NIHMS1580782-supplement-sup_figure_s2b.pdf [file NIHMS1580782-supplement-sup_figure_s2b.pdf]
