# Supplementary material
Source: PubMed Central journal article supplement (PMC7398559)

# Supplementary Figure S1a. ND-CTRD Unique Gene Interaction Network

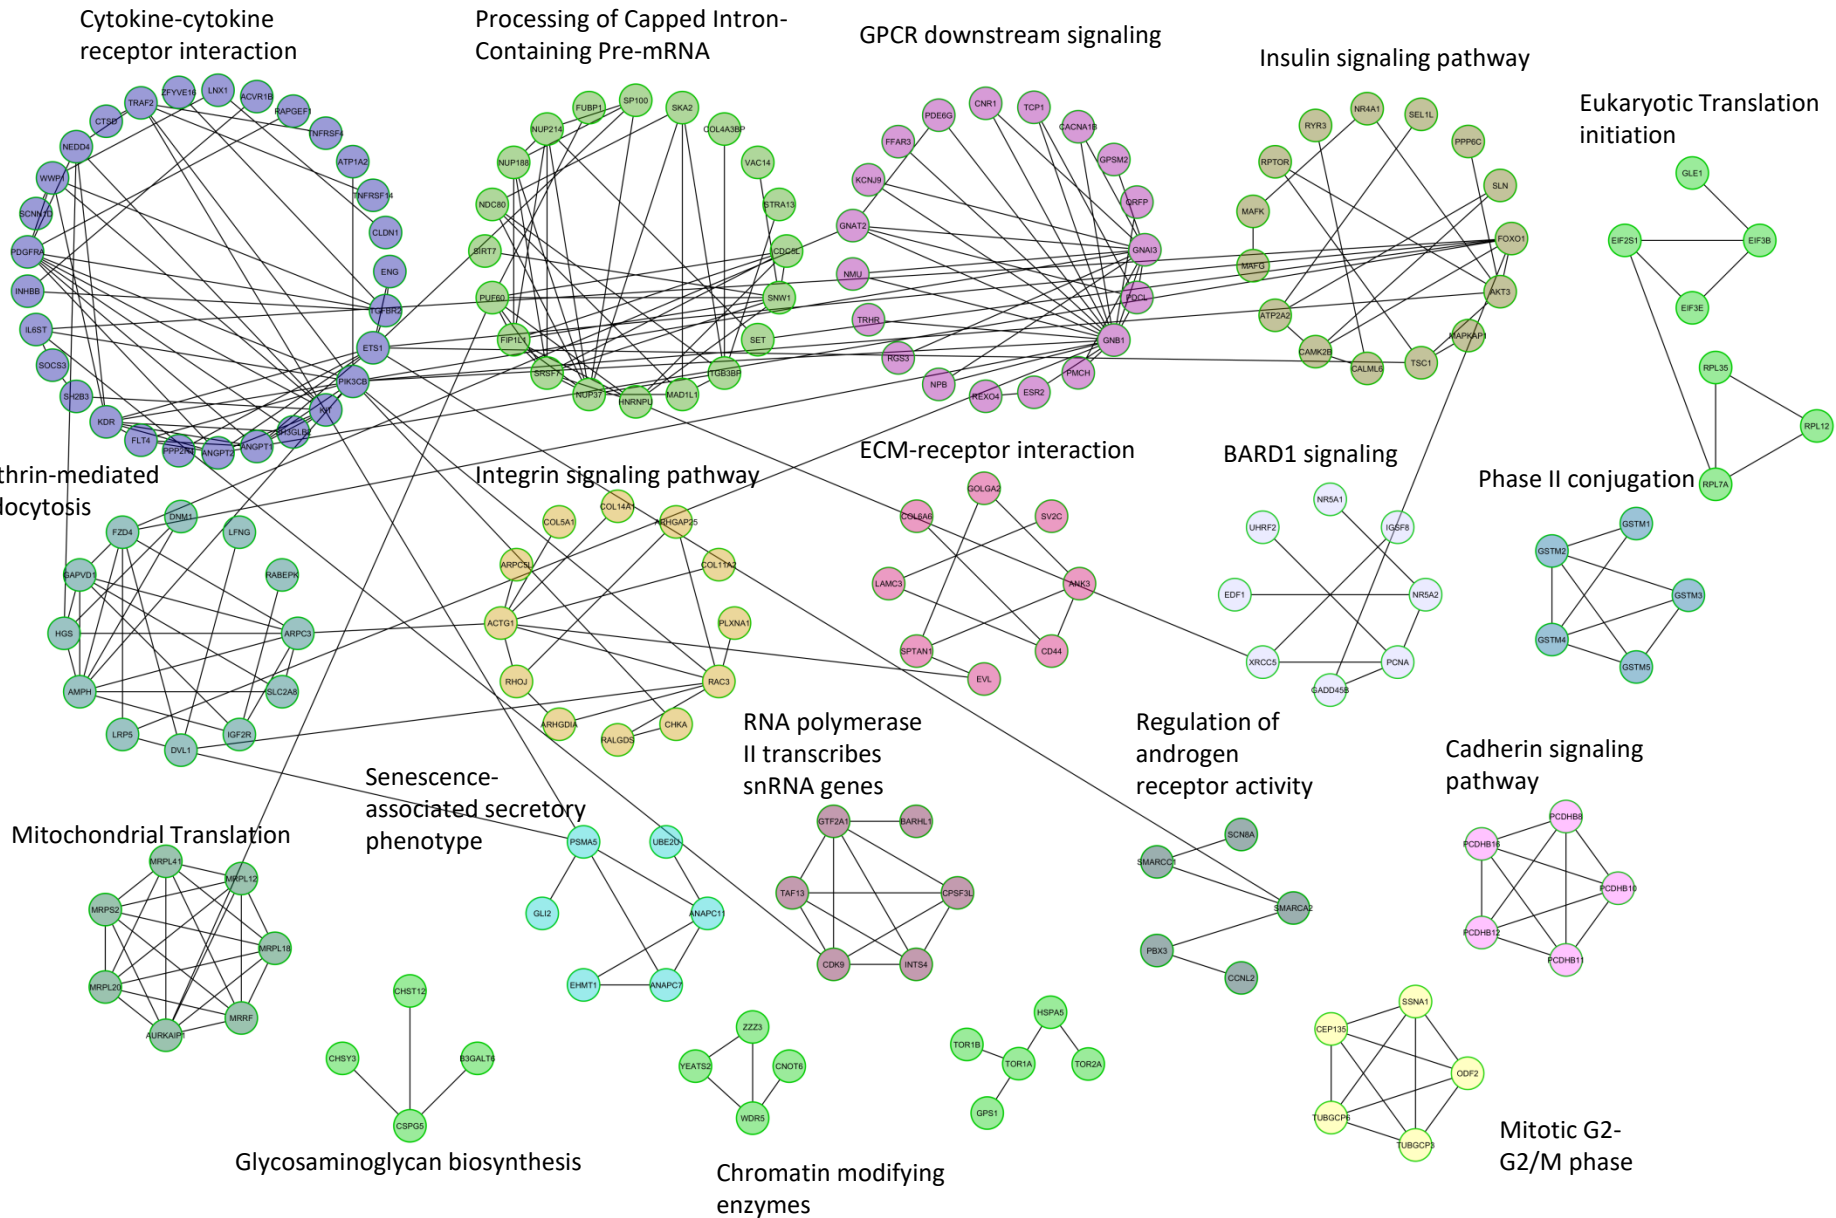

Supplement: NIHMS1580782-supplement-sup_figure_s1a.pdf [file NIHMS1580782-supplement-sup_figure_s1a.pdf]

# Supplementary Figure S1b. DS-CTRD Unique Gene Interaction Network

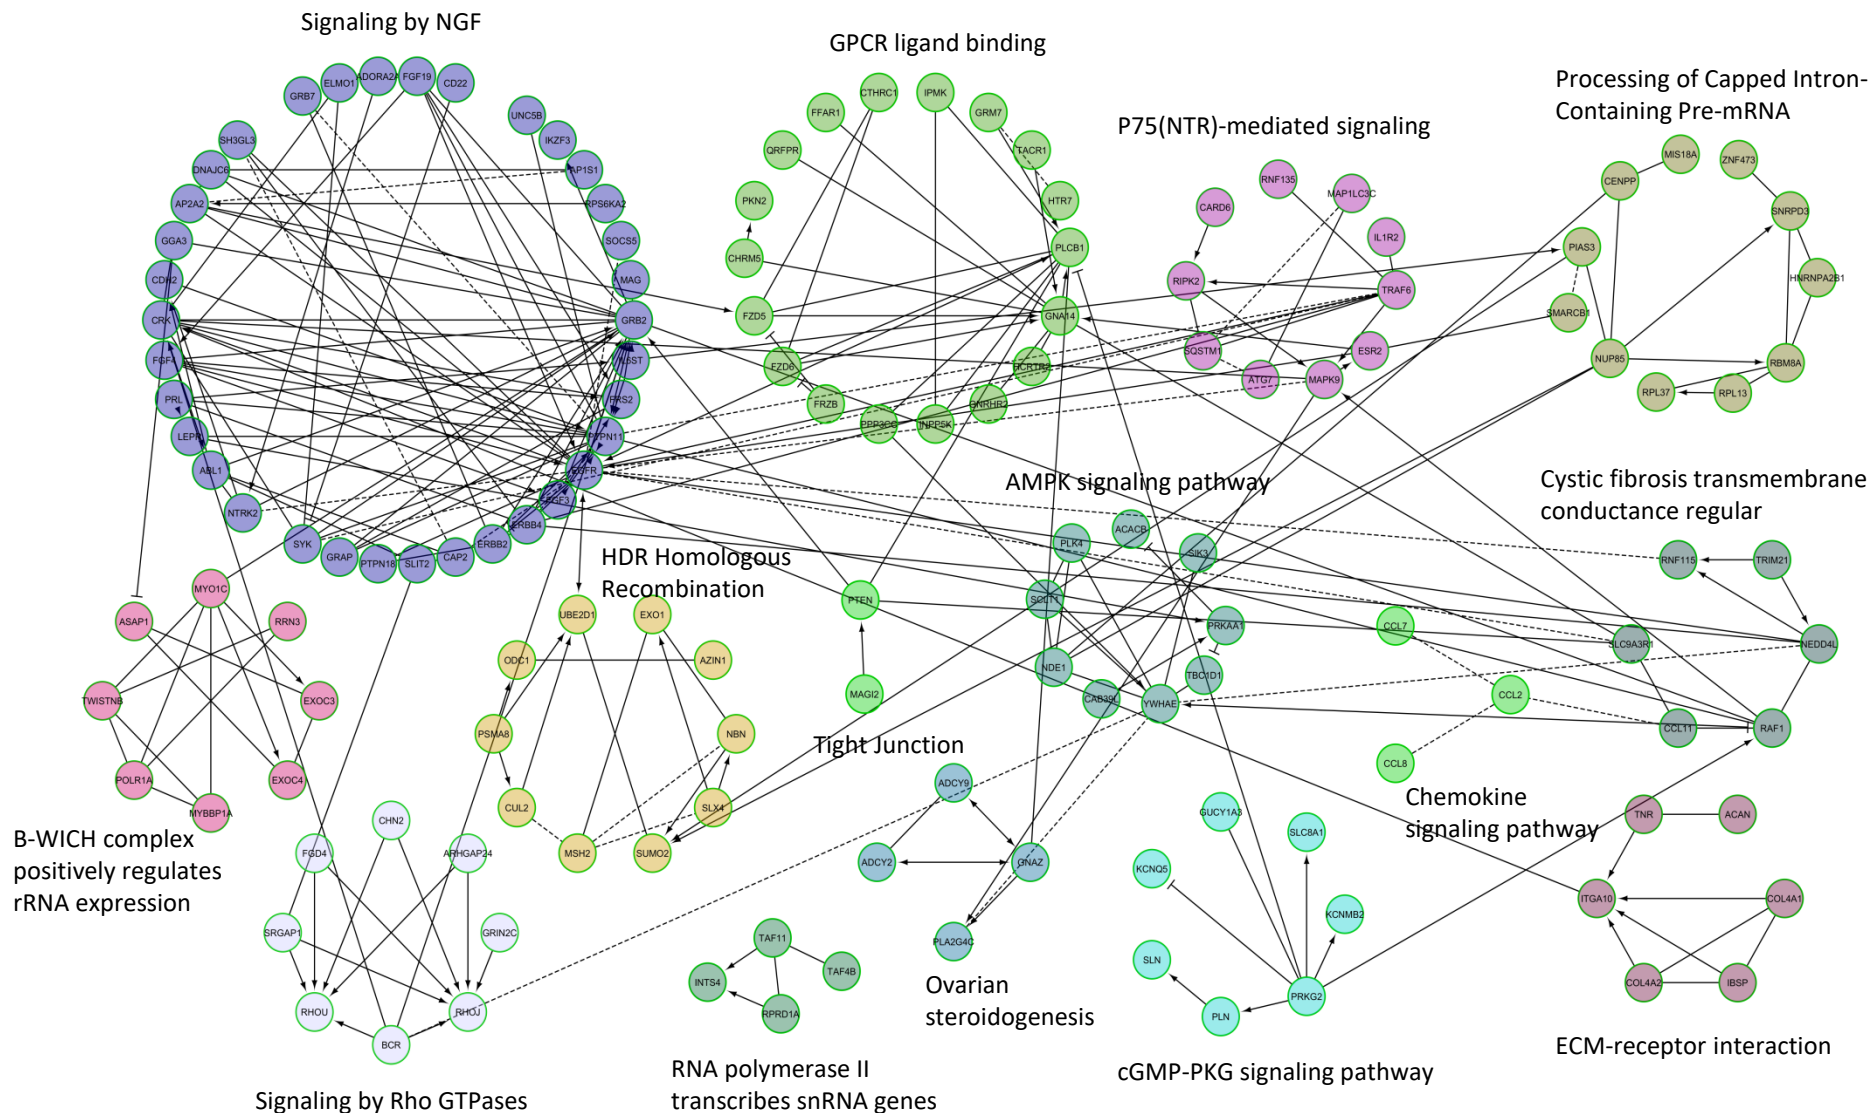

Supplement: NIHMS1580782-supplement-sup_figure_s1b.pdf [file NIHMS1580782-supplement-sup_figure_s1b.pdf]
